# Supplementary material for: Infection Rate Comparison during Transition from Hospital to Office WALANT Enabled by Virtual Reality
Source: PubMed Central journal article supplement — Plast Reconstr Surg Glob Open. 2022 May 13;10(5):e4285. doi: 10.1097/GOX.0000000000004285 (PMC9187176; doi:10.1097/gox.0000000000004285), 2022-05-13
Supplement: gox-10-e4285-s002.pdf [file gox-10-e4285-s002.pdf]

Decreased expenses & increased  
access to the OPR

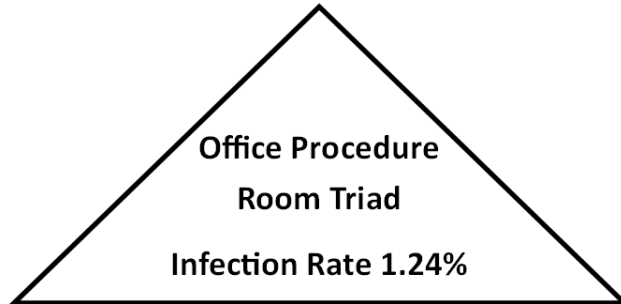

Simple field prep reduces waste

No increased risk for infection

No anesthetic risk

from WALANT & WAVR
